# Supplementary material
Source: MDPI journal article supplement (https://www.mdpi.com/1999-4907/7/11/287)
Supplement: s1 [file s1]

Supplemental Material: Biomass Accumulation and Net Primary Production during the Early Stage of Secondary Succession after a Severe Forest Disturbance in Northern Japan

Tomotsugu Yazaki, Takashi Hirano and Tomohito Sano

**Table S1.** Tree height, stem diameter, and biomass for the allometric equation of deciduous trees.

| **No.** | **Height** | **Stem diameter** |  |  | **Biomass** |  |  | **Logarithum** | |  |  |
| --- | --- | --- | --- | --- | --- | --- | --- | --- | --- | --- | --- |
|  |  | surface | breast height |  | leaf | stem and branch | coarse root |  |  |  |  |
|  | *H* | DS0 | DBH | DS02 × *H* | BL | BSB | BCR | ln(DS02 × *H*) | ln(BL) | ln(BBB) | ln(BCR) |
|  | m | m | m |  | g | g | g |  |  |  |  |
| 1 | 0.550 | 0.00752 |  | 0.0000311 | 6.8 | 9.6 | 12.1 | −10.4 | 1.92 | 2.26 | 2.49 |
| 2 | 0.560 | 0.00791 |  | 0.0000350 | 4.6 | 4.3 | 6.0 | −10.3 | 1.53 | 1.46 | 1.79 |
| 3 | 1.06 | 0.0135 |  | 0.000192 | 10.6 | 20.7 | 8.1 | -8.56 | 2.36 | 3.03 | 2.09 |
| 4 | 1.09 | 0.0210 |  | 0.000479 | 23.2 | 57.0 | 28.1 | −7.64 | 3.14 | 4.04 | 3.34 |
| 5 | 1.44 | 0.0327 | 0.00230 | 0.00154 | 54.8 | 120.8 | 81.6 | −6.48 | 4.00 | 4.79 | 4.40 |
| 6 | 1.46 | 0.0221 | 0.00650 | 0.000710 | 29.4 | 93.1 | 42.5 | −7.25 | 3.38 | 4.53 | 3.75 |
| 7 | 1.96 | 0.0281 | 0.00686 | 0.00155 | 67.7 | 151.5 | 54.4 | −6.47 | 4.22 | 5.02 | 4.00 |
| 8 | 1.99 | 0.0297 | 0.00851 | 0.00175 | 63.8 | 189.7 | 69.2 | −6.35 | 4.16 | 5.25 | 4.24 |
| 9 | 2.49 | 0.0283 | 0.0138 | 0.00199 | 97.5 | 335.0 | 107 | −6.22 | 4.58 | 5.81 | 4.67 |
| 10 | 2.58 | 0.0285 | 0.0163 | 0.00210 | 93.2 | 433.5 | 118 | −6.17 | 4.53 | 6.07 | 4.77 |
| 11 | 2.90 | 0.0370 | 0.0180 | 0.00397 | 116.0 | 641.6 | 174 | −5.53 | 4.75 | 6.46 | 5.16 |
| 12 | 3.06 | 0.0365 | 0.0195 | 0.00408 | 74.4 | 705.7 | 199 | −5.50 | 4.31 | 6.56 | 5.29 |
| 13 | 5.57 | 0.0867 | 0.0604 | 0.0418 | 973.2 | 6462.8 | 2141 | −3.17 | 6.88 | 8.77 | 7.67 |
| 14 | 7.57 | 0.113 | 0.0855 | 0.0968 | 1323.5 | 13538.0 | 5150 | −2.33 | 7.19 | 9.51 | 8.55 |

**Table S2.** Mean leaf biomass classified by species in August–September.

| **Year** | **Month** | **Day** | ***Rubus idaeus*** | ***Solidago gigantea*** | **Fern** | ***Pachysandra terminalis*** | ***Schisandra chinensis*** | **other herbeous plants** | **other woody plants** | **Total** | **SE 1** |
| --- | --- | --- | --- | --- | --- | --- | --- | --- | --- | --- | --- |
|  |  |  | g m−2 | | | | | | | | |
| 2006 | September | 3 | 66.2 | 6.2 | 13.5 | 12.6 | 0.1 | 79.6 | 0.0 | 178 | 20 |
| 2007 | August | 12 | 78.5 | 4.1 | 28.1 | 9.4 | 6.5 | 30.1 | 6.7 | 163 | 29 |
| 2009 | September | 2 | 81.3 | 14.6 | 5.0 | 5.9 | 5.7 | 21.9 | 4.1 | 139 | 21 |
| 2011 | September | 9 | 33.1 | 92.8 | 0.6 | 0.1 | 0.9 | 18.9 | 18.1 | 164 | 15 |
| 2012 | September | 5 | 38.0 | 86.4 | 3.4 | 1.4 | 6.3 | 17.1 | 6.4 | 159 | 17 |
| 2013 | August | 27 | 10.6 | 70.5 | 2.7 | 0.7 | 15.2 | 12.5 | 8.7 | 121 | 15 |
| 2014 | September | 3 | 2.4 | 52.6 | 36.8 | 5.9 | 19.5 | 13.9 | 8.7 | 140 | 30 |

1 SE denotes the standard error of the total leaf biomass (*n* = 10)

**Table S3.** Specific leaf area (cm2 g−1) by species used for this study.

|  | **July 2006** | **September 2006** | **July 2007** | **August 2007** | **July 2009** | **September 2009** | **August 2014** | **Mean** |
| --- | --- | --- | --- | --- | --- | --- | --- | --- |
| *Rubus idaeus* | 235 | 185 | 214 | 181 | 260 | 153 |  | 205 |
| *Solidago gigantea* | 184 | 167 | 213 | 140 | 228 | 157 |  | 181 |
| Fern (*Drypoteris* spp.) | 162 | 192 | 242 | 197 | 218 | 230 |  | 207 |
| *Pachysandara terminalis* |  |  | 159 | 136 | 157 | 155 |  | 152 |
| *Schisandra chinensis* |  |  | 541 | 354 | 420 | 411 |  | 432 |
| other herbaceous plats | 227 | 154 | 226 | 283 | 210 | 336 |  | 239 |
| other woody plants |  |  | 236 | 245 | 210 | 211 |  | 226 |
| *Betula platyphylla* |  |  |  |  |  |  | 111 | 111 |

**Table S4.** Parameters related fine root for NPP estimation

| **Parameters** | ***n*** | **Values** | **note** |
| --- | --- | --- | --- |
| Turnover ratio of fine root (TRFR) |  |  |  |
| overstory trees (woody plants) |  | 0.65 | mean of tempeatre forests [43] |
| Understory vegetation (herbaceous plants) |  | 0.25 | mean of temperate shrubs [43] |
| Fraction of fine toot to total belowground biomass |  |  |  |
| overstory trees | 5 | 0.231 ± 0.032 | This study site (mean ±1 standard error) |
| Understory vegetation | 10 | 0.332 ± 0.023 | This study site (mean ±1 standard error) |

**Table S5.** Aboveground biomass (g·m−2) of understory species.

| **Year** | **Month** | **Day** | ***Rubus idaeus*** | ***Solidago gigantea*** | **Fern (*Dryopteris* spp.)** | ***Pachysandra terminalis*** | ***Schisandra chinensis*** | **other herbeous plants** | **other woody plants** | **Total** | **SE 1** |
| --- | --- | --- | --- | --- | --- | --- | --- | --- | --- | --- | --- |
| 2006 | July | 2 | 66.0 | 3.5 | 28.6 | 11.6 | 0.0 | 45.8 | 2.5 | 157.9 | 16.1 |
| July | 29 | 169.4 | 9.4 | 25.8 | 14.2 | 0.0 | 48.2 | 0.0 | 267.0 | 35.0 |
| September | 3 | 132.5 | 21.6 | 13.5 | 12.6 | 0.1 | 89.0 | 0.0 | 269.2 | 29.0 |
| October | 19 | 91.9 | 4.7 | 19.7 | 5.9 | 0.8 | 25.9 | 0.5 | 149.4 | 45.4 |
| November | 1 | 79.6 | 5.6 | 9.9 | 13.9 | 0.6 | 34.1 | 0.6 | 144.2 | 21.8 |
| December | 7 | 52.7 | 0.0 | 1.3 | 6.9 | 1.3 | 7.6 | 0.1 | 69.9 | 13.6 |
| 2007 | May | 18 | 72.2 | 0.4 | 0.3 | 28.2 | 0.0 | 23.7 | 1.1 | 125.9 | 15.2 |
| July | 11 | 252.4 | 19.0 | 15.9 | 16.4 | 6.9 | 48.5 | 37.1 | 396.2 | 45.9 |
| August | 12 | 212.8 | 7.0 | 28.1 | 20.5 | 15.0 | 37.2 | 18.6 | 339.1 | 48.5 |
| October | 11 | 150.2 | 16.9 | 14.2 | 12.8 | 4.0 | 18.7 | 8.0 | 224.7 | 40.3 |
| December | 2 | 141.2 | 0.0 | 2.5 | 12.0 | 3.1 | 0.5 | 5.0 | 164.2 | 38.1 |
| 2009 | May | 4 | 67.4 | 0.6 | 0.0 | 12.1 | 7.1 | 1.4 | 36.2 | 124.7 | 23.5 |
| July | 3 | 180.6 | 22.3 | 36.6 | 10.9 | 7.3 | 36.0 | 38.8 | 332.4 | 38.7 |
| September | 2 | 280.8 | 42.5 | 5.0 | 12.9 | 12.3 | 30.6 | 13.1 | 397.2 | 54.3 |
| November | 20 | 150.9 | 0.0 | 6.3 | 7.5 | 6.1 | 3.1 | 8.7 | 182.5 | 30.6 |
| 2010 | June | 2 | 78.5 | 27.0 | 0.1 | 8.2 | 3.1 | 19.4 | 6.3 | 142.6 | 17.7 |
| July | 22 | 185.8 | 73.6 | 0.8 | 7.4 | 7.7 | 28.8 | 20.6 | 324.7 | 31.5 |
| 2011 | May | 11 | 44.7 | 3.7 | 0.0 | 10.4 | 3.1 | 3.5 | 4.6 | 70.0 | 11.8 |
| June | 24 | 57.3 | 43.9 | 0.0 | 10.1 | 9.7 | 17.0 | 15.6 | 153.6 | 13.1 |
| August | 6 | 131.3 | 243.5 | 4.7 | 4.9 | 11.4 | 23.5 | 19.9 | 439.3 | 40.3 |
| September | 9 | 161.6 | 261.1 | 0.6 | 0.2 | 1.8 | 24.5 | 21.9 | 471.8 | 35.0 |
| December | 2 | 97.1 | 100.0 | 2.1 | 7.0 | 3.4 | 6.6 | 12.9 | 229.0 | 32.1 |
| 2012 | September | 5 | 120.6 | 254.4 | 3.4 | 2.9 | 19.8 | 17.7 | 17.1 | 436.0 | 40.2 |
| 2013 | August | 27 | 29.3 | 183.9 | 2.7 | 1.2 | 43.6 | 12.7 | 24.7 | 298.1 | 33.2 |
| 2014 | May | 7 | 19.7 | 6.3 | 0.7 | 24.4 | 12.3 | 1.4 | 55.7 | 120.6 | 29.5 |
| July | 3 | 22.4 | 80.4 | 3.8 | 14.9 | 33.6 | 14.7 | 34.7 | 204.6 | 18.2 |
| July | 29 | 15.4 | 108.1 | 1.1 | 13.9 | 43.8 | 13.8 | 40.7 | 236.6 | 28.7 |
| September | 3 | 4.3 | 139.2 | 36.8 | 11.5 | 52.5 | 23.2 | 40.0 | 307.6 | 39.8 |
| November | 5 | 1.9 | 71.5 | 3.7 | 9.6 | 20.0 | 4.5 | 18.4 | 129.5 | 26.6 |

1 SE denotes the 1 standard error of the biomass (n=10)

**Table S6.** Stand density, tree height, biomass, and dead biomass in the regenerated forest.

| **Variables** | **Unit** | **Value** |  |  |  |  |
| --- | --- | --- | --- | --- | --- | --- |
|  |  | 2010 | 2011 | 2012 | 2013 | 2014 |
| Stand density | trees·ha−1 | 3192 | 3967 | 3908 | 3775 | 4375 |
| Stand density (taller than 2.0 m) | trees·ha−1 | 692 | 1142 | 1342 | 1625 | 1717 |
| Mean tree height | m | 1.49 | 1.61 | 1.73 | 1.99 | 2.02 |
| Mean tree height (taller than 2.0 m) | m | 2.51 | 2.67 | 2.84 | 3.06 | 3.34 |
| Maximum tree height | m | 4.10 | 4.65 | 5.02 | 5.60 | 6.10 |
| Basal area (taller than 2.0 m) | m2·ha−1 | 0.195 | 0.311 | 0.469 | 0.783 | 1.121 |
| Dead tree density | trees ha-1 |  | 142 | 142 | 225 | 517 |
| Dead tree density (taller than 2.0 m) | trees ha-1 |  | 8.33 | 16.67 | 50.00 | 91.67 |
|  |  |  |  |  |  |  |
| Leaf biomss | Mg ha-1 | 0.233 | 0.363 | 0.449 | 0.512 | 0.689 |
| Stem and trank biomass | Mg ha-1 | 0.495 | 0.856 | 1.243 | 1.424 | 2.122 |
| Coarse-root biomass | Mg ha-1 | 0.215 | 0.347 | 0.457 | 0.526 | 0.736 |
|  |  |  |  |  |  |  |
| Dead aboveground biomass | Mg ha-1 |  | 0.00892 | 0.00733 | 0.03970 | 0.06204 |
| Dead coarse root biomass | Mg ha-1 |  | 0.00295 | 0.00245 | 0.01128 | 0.01868 |

© 2016 by the authors. Submitted for possible open access publication under the terms and conditions of the Creative Commons Attribution (CC-BY) license (http://creativecommons.org/licenses/by/4.0/).
